# Supplementary material for: Middle and Late Pleistocene climate and continentality inferred from ice wedges at Batagay megaslump in the Northern Hemisphere’s most continental region, Yana Highlands, interior Yakutia
Source: Copernicus journal article supplement (doi:10.5194/cp-2018-142), 2018-10-30
Supplement: Supplementary file [file cp-2018-142-AC1-supplement.pdf]

## Reply to referee's comments

We much appreciate the efforts of both referees reviewing our manuscript. Both reviewers raised some points that will help us to improve our manuscript. Our replies are given below in blue.

### Anonymous Referee #1

The authors present a reconstruction of winter precipitation isotope ratios and inferred winter temperatures from relict ice wedges in Pleistocene strata in the Batagay megaslump headwall and late Holocene wedge ice near the Adycha River. These wedges span the last ~140 ka. The authors claim this study fills an important gap in knowledge of paleoclimate of the Yana Highlands. Temporal variations in the isotopic composition of the ice wedges, particularly the wedges that are well-dated and substantial in size (i.e., least prone to post-depositional overprinting), broadly support the conclusion that past stadial and interstadial winters in this region were cooler than today. Further, wedge ice from other areas across Siberia are more enriched than the Yana Highlands, both today and in the past, which suggests this region has always been the most continental area in northern Siberia.

Thank you for this accurate summary!

I read this paper with great interest. Relict ice wedges are an important paleo-meteoric water archive with a tightly constrained seasonality (winter only) and offer some of the oldest known ice in the Northern Hemisphere, extending beyond the temporal limits of the Greenland ice cores. As I see it, ice wedges have an important role to play in advancing our knowledge of Quaternary climate change in non-glaciated Arctic regions where ice cores are not possible.

The authors do a good job explaining their methods and summarising the most important features of this interesting dataset. There are several uncertainties about the integrity of the smaller ice wedge samples, and dating of the pre-MIS 3 wedges, but the authors are up-front about these uncertainties and to a large extent they do not confound the conclusions highlighted in this paper. This paper lays the groundwork for future studies to develop more detailed ice wedge records and paleoclimate inferences from this site. The topic and scope of this work are highly appropriate for *Climate of the Past*.

I am mostly satisfied with the paper in its current form, but I have a few concerns that I feel should be addressed before it is accepted in final form. Following these revisions I would recommend this paper is accepted.

Thank you for this assessment of our manuscript and for your suggestions and comments we used to improve the manuscript! Please see below for details.

#### Major comments:

To establish how much more continental the study area was in the past, the authors should consider that the global oceans were more enriched during past cold stages. For example, during MIS2 mean ocean water was ~1.2‰ enriched in  $^{18}\text{O}$ . In the discussion, please acknowledge this and provide some discussion – note that standardising for this effect would make some of the relict wedge ice (e.g., B17-IW4) similar in value to the late Holocene wedge ice. I do appreciate there are uncertainties about paleo-source region and possible heterogeneity in the isotope composition of marine source waters. However, some attention to this issue is needed.

Thank you for this suggestion. We agree that this is an important issue when interpreting relict ice isotopes. We, therefore, added this aspect to the discussion in section 5.3. However, we decided not to standardize and recalculate our isotope values. We think that this is not viable because we don't know the exact ages of the studied ice wedges, and so we don't know exactly what sea level was at that time and how isotopically enriched ocean water was exactly.

#### specific comments

P2, L31 – 'right side' is ambiguous, since it depends on which direction one is oriented.

We replaced “right bank” with “east bank” for clarification.

P3, L13 – ‘MIS6 or MIS7’. Does cryostratigraphy provide any indication if this deposit (and the ice wedges) represent a glacial or interglacial period? Ideally say which is more likely.

The cryostratigraphy does not really arbitrate between glacial and interglacial conditions, though the narrow syngenetic wedges and abundance of windblown sand is more consistent with glacial conditions. Palaeoecological data rather indicate the MIS 6 cold stage (Ashastina et al., 2018). We therefore removed the reference to MIS 7 in the entire manuscript.

P4, L1 – you refer to this as the second study site, which is understandable but also confusing since there is a ‘Site 2’ in Figure 2.

We changed this sentence and omitted “second study site”.

P4, L23-25 – if possible, please give a reference for pore ice-wedge ice exchange.

We added two references (Meyer et al, 2002a and Meyer et al., 2010).

P5, L21 – ‘outlined below’

Changed accordingly.

P6, L23 – what is meant by redistribution?

We mean relocation of the hare dropping by erosion and deposition processes within the degrading slump which resulted in a contamination. We changed the sentences for clarification.

P11, L5-8 – The co-isotope linearity of this cluster is remarkable. Why not report the slope, intercept and  $r^2$  for a line drawn through all data within a cluster, as was done for the individual wedges?

Thank you for this suggestion, we added this information to Table 1 and the text.

P11, L8-9 – arguably, the MIS6 wedge is part of the first cluster. Only one of the datapoints is an outlier.

We assume you refer to ice wedge B17-IW6 from the Upper Ice Complex, not the MIS 6 ice wedge B17-IW1. We agree that 3 out of 4 samples plot below and close to the GMWL. Therefore, we added B17-IW6 to cluster 1.

P11, L12-15 – this could be explained more. If you are correct, then divergence from the Cluster 1 line could provide valuable information about aridity.

The observed relation between wedge  $d$  excess and cryostratigraphic interpretation (high  $d$  excess corresponding to wedges formed during drier conditions, lower  $d$  excess corresponding to wedges formed during moister conditions) might indeed point towards the divergence from cluster 1 (or GMWL) as indicator of aridity (or drier conditions). This, however, needs thorough evaluation as it might be a site or regional feature and has not been observed in today’s coastal ice-wedge sites. We changed the wording in the manuscript for more clarity.

P11, L17 – please add a reference (e.g., Pfahl and Sodeman, 2014, Clim. Past.)

Thank you for this suggestion. We added this reference.

P11, L21 – this is an interesting line of discussion. Can you expand on this point, and comment on how different snowpack evolutions would be expected to influence the isotopic composition of the eventual meltwaters?

Little is known yet about the isotopic changes of the winter precipitation in the snowpack before its incorporation into wedge ice. A few studies suggest an isotopic enrichment in the snowpack and/or the snowmelt prior to filling of frost cracks (see Opel et al., 2018, Permafrost and Periglacial Processes; Ginter et al., 2018, Quaternary Research) due to several processes (e.g. sublimation and

depth-hoar development). The effect on  $d$  excess hasn't been estimated yet. For intrasedimental ice it is even more unclear as several freeze-thaw cycles have to be taken into account. We, therefore, added only a few words and the references to the text.

P12, L2-5, the point of this sentence is not entirely clear.

We changed this sentence for clarity.

P12, L9, specify that you are talking about  $d_{18O}$ . Also, I would advise against specifying a number (e.g., -40) ... better to simply say even more depleted values compared to MIS3 wedge ice is expected.

Changed accordingly.

P12, L18-19, please clarify what is meant here.

We deleted this sentence.

P14, L1, clarify that mean dexcess of 6 permille is a Late Holocene value ... same for the Yakutia example.

Changed accordingly.

P14, L18-20, this last sentence seems irrelevant to the study ... further, it is not clear how this study area provides the ideal conditions are validating/advancing the CI dating method. Suggest deleting this sentence.

The Batagay megaslump may be a very good site to validate/advance the  $^{36}Cl/Cl^-$  dating approach, as it provides both, very old ice and a logical stratigraphy. The latter is missing at other study sites in the Siberian North that exhibit complex spatial stratigraphic patterns. However, as suggested by ref#2 we move this aspect to the discussion (section 5.1) and expand it slightly.

Figure 7. the #7 datapoint is missing x/y error bars.

We checked this figure again and found that there are error bars for datapoint #7. There are, however, no error bars for the second Batagay datapoint (#16) as these values haven't been reported by Vasil'chuk et al., 2017. We furthermore updated the dataset for several sites and therefore this figure as suggested by ref#2.

## **Anonymous Referee #2**

The manuscript presents stratigraphy, geochronology, and ice-wedge stable isotope data from the Batagay megaslump- a remarkable bluff of late-Middle- and and Late-Pleistocene sediments in interior Yakutia exposed by a spectacularly-large thaw slump. They add some new radiocarbon dates to the emerging chronological framework for this site, and provide some new stable O and H isotope data for a small number of ice-wedges ranging in age from MIS 6(?) to the Holocene. Focusing on the broad MIS 3 interval, the authors conclude that winter temperatures during MIS 3 were colder at this site in interior Yakutia, relative to a compilation of purportedly MIS 3 ice wedges from mostly coastal sites.

Thank you for this summary.

In principle I think data and discussion from this kind of proxy archive are a good fit for the scope and audience for *Climate of the Past*. I also think this site is really a remarkable find, particularly because of the potential for preservation of pre-MIS 5 relict ground ice. The writing and figures are mostly clear. But several factors make me unable to recommend publication: 1 Relatively low number of analyses 2 Poor chronology that inhibits meaningful comparison between sites 3 Speculative nature of the paleoclimate discussion.

I elaborate on these points below, with more specific comments at the end.

Thank you for your assessment, we respond to your more detailed comments below.

Note: Though the title of the manuscript alludes to Middle and Late Pleistocene climate and continentality, my main points of concern are limited to the MIS 3 part of the story because the authors acknowledge that the data from younger and older parts of the sequence are equivocal (p14/line10).

1. The Batagay megaslump headwall exposure is over 1 km long, yet the conclusions re: MIS 3 rest on data collected from only two ice wedges at a single measured section. The discussion and conclusion around Holocene climate is similarly based on analyses of only a single ice wedge. I realize that field work on sites like this is difficult and potentially dangerous, but the chainsaw sampling is rapid and contemporary analytical techniques allow for hundreds of samples to be analyzed in relatively short order. Rather than limited and equivocal results from a reconnaissance visit to the field site, my sense is that this topic deserves “high-resolution systematic sampling and dating”, as the authors point out in their conclusion.

We acknowledge that a larger number of studied ice wedges and samples would have been better but unfortunately this could not be realized due to short time in the field and dangerous outcrop conditions, in particular close to the headwall. However, we are convinced that our results and conclusions presented in this study are not equivocal (as also stated by referee 1) but worth to be published in *Climate of the Past* for the following reasons:

1. The Yana Highlands as most continental region of the Northern Hemisphere are largely understudied in terms of palaeoclimate research.
2. We present stable isotope data of six ice and composite wedges from the Batagay megaslump and one ice wedge from the nearby Adycha River. When compared to previous ice-wedge studies this is not a low number of studied wedges.
3. We present this for the first time in an international peer-reviewed journal and the first data at all for MIS 6 and MIS 1. Our data for the MIS 3 is confirmed by independent data previously published in Russian by Vasil'chuk et al. (2017) but we provide additional cryostratigraphic context and new radiocarbon ages.
3. Our Batagay MIS3 stable isotope data show unprecedented low  $\delta^{18}\text{O}$  values and remarkably high  $d$  excess values that are worth to be published and discussed.
4. Our study is the first one that compares published and yet unpublished ice-wedge stable isotope data for the MIS 3 across Siberia and show that winter temperatures during the MIS 3 have been lower in the Yana Highlands than in all other regions. A similar pattern is found for the late Holocene and can be deduced for modern winter precipitation.
5. We deduce that the extreme continentality known from modern meteorological observations persisted also during the MIS 3 and the late Holocene.
6. We present new ice-wedge observations and relate them together with the stable isotope composition of ice and composite wedges to the deposition regimes of the different units exposed in the Batagay megaslump.
7. We furthermore present the first pore-ice stable isotope data for the Yana Highlands.

2. Most critically, I question if the available data support a meaningful conclusion re: MIS 3. In other words, what does it actually mean to compare a single probably-MIS3 ice-wedge from one site to another single probably-MIS3 ice-wedge from another site (as is done in Fig 7 and Table S2), since this interval spans ~30,000 years and includes some pretty high-amplitude multi-millennial-scale climate oscillations in high-resolution proxy records?

We already acknowledged in the manuscript that there are some limitations in the dataset used for the spatial comparison:

“Additionally, all except two of the considered wedges or their host sediments have been directly dated by radiocarbon methods to between about 50 and 30 ka ago. We appreciate that an ice wedge

may not contain a full record of this time period and that the climate was not uniform throughout this period; in particular, a warmer period around 40 ka BP is well known from several palaeoecological proxies for some of the study sites (Wetterich et al., 2014).”

However, we don't know yet if millennial-scale climate oscillations characterized MIS 3 in East Siberia (West Beringia), underlining the need for some high-resolution records covering this period to determine if they did exist. Thus, we are uncertain of their spatial extent and significance in the ice-age Northern Hemisphere. Following Murton et al. (2017), there are indeed hints that the MIS 3 in northern areas of Northeast Siberia was a time of general climate stability. Other records suggest that the interstadial climate was not monolithic, but that the early interstade was characterized by dry but relatively warm conditions, and cooler and drier climates prevailed later in MIS 3 (e.g. Kienast et al. 2005, *Quaternary Research*; Sher et al. 2005, *Quaternary Science Reviews*; Lozhkin et al. 2007, *Journal of Paleolimnology*; Wetterich et al. 2014, *Quaternary Science Reviews*). This pattern differs from more southerly sites with evidence for numerous climate fluctuations (Lozhkin&Anderson. 2011, *Quaternary Science Reviews*).

To ensure the best possible quality of the dataset

- 1) we excluded the MIS2 period which shows lower temperatures in Northeast Siberia and limited the time period of interest to 50 to 30 ka;
- 2) except of two ice wedges (one of these is also from the Batagay megaslump (Vasil'chuk et al., 2017) we considered only dated ice wedges (radiocarbon dating of host sediments or ice wedges);
- 3) we reported not only mean values for the respective ice wedges but also standard deviations to account for climate-dependent  $\delta^{18}O$  variations captured by the ice wedges;
- 4) we used only ice wedge datasets that include both  $\delta^{18}O$  and  $\delta D$  (to be able to detect outliers due to post-depositional processes).

The time interval is also notoriously difficult to date accurately with  $^{14}C$  methods, and many purportedly finite ~35-45  $^{14}C$  ka BP dates in the literature ought to be viewed with a strong dose of skepticism (notably, for example, the purported MIS 3 chronology for Mamontova Gora - an important comparative site Fig 7/Table S2).

To our understanding,  $^{14}C$  dating has made substantial progress over the last years, making  $^{14}C$  dating even in the age range 35-45  $^{14}C$  years much more reliable. Calibration is possible back to 50ka cal BP (Reimer et al., 2013, *Radiocarbon*). All  $^{14}C$  ages used in the manuscript are from the last about 15 years and not from older literature. This is also true for the  $^{14}C$  age from Mamontova Gora (Popp et al., 2006, *Permafrost and Periglacial Processes*).

Furthermore, we are using  $^{14}C$  to identify the MIS 3 as a whole, not its substages, i.e. MIS 3 rather than Dansgaard Oeschger events. So, the technique applied is adequate to do this.

Seven out of the 18 sites in the Fig 7/Table S2 ice-wedge compilation are unpublished, so readers can't assess the reliability of these chronologies for themselves.

All stable isotope data used for Figs. 7-9 including previously unpublished data will be made available in PANGAEA after acceptance of the manuscript, except the data from Vasil'chuk et al. (2017).

The authors mention the issue of dating and a long MIS 3 (p12/line26) but do not really address it in a way that justifies the approach. One example of the interpretive difficulties: Novaya Sibir, Belkovsky, and Kotel'ny are all above 74 degN in the New Siberian Islands, yet only Novaya Sibir has relatively depleted isotope composition. Is the between-site difference in isotope composition due to differing age or some sitespecific factor? Either way, the lack of good chronological control inhibits meaningful comparison.

The focus of our study is on the ice wedges from Batagay and we use the other data to illustrate the peculiarity of the Yana Highlands. To distinguish between age- and/or site-specific aspects in the New Siberian Islands is beyond the scope of this paper. By focusing on broad MIS timescale, the isotope

values from Batagay contrast significantly with those from other sites. Despite uncertainties in age the ice Batagay wedges are more depleted than any other North Siberian site

One last point of criticism on the comparison of different sites: why was the compilation/comparison limited to just one “MIS 3” ice-wedge from each site? In the context of this analysis, would it not be more useful to compare the average isotope composition of multiple ice-wedges from a particular stratigraphic interval (e.g. the 10 ice wedges with  $\delta D$  and  $\delta^{18}O$  data attributed to the yedoma ice complex in Opel et al 2017)?

Thank you for this comment. Unfortunately for several site we rely on only one studied ice wedge. However, we followed the referee’s suggestion and reviewed again stable isotope data related to the MIS 3 ice wedges. We added all available data to the following study sites: Lena Delta/Kurungnakh (4), Bykovsky (6), Muostakh (7), Buor Khaya (8), Belkovsky (9), Stolbovoy (10), Bol’shoy Lyakhovsky (12), and Oyogos Yar (13) and updated Figures 7 to 9 and Table S3 accordingly.

3. I acknowledge that quantitative paleoclimate reconstruction from this type of archive is highly uncertain, but the climate implications presented here are vague. Differences in isotope composition between areas are quantified, but then unsupported paleotemperature interpretations are made (e.g. “significantly lower [temperatures]” p14/line7; “extremely low winter temperatures” p11/line23 vs “very low winter temperatures” p11/line26). These distinctions need to be defined.

The paleotemperature interpretation has followed a tentative classification and is not based on reliable temperature calibration. We, therefore, decided to omit the use of this paleotemperature interpretation. We have changed the text and Table 4 accordingly.

The authors have not really addressed the issue of paleogeography, nor potential differences in moisture source both through time and for different sites. For example (assuming for a moment that it’s possible to meaningfully compare MIS 3 IWs at the Batagay site to those compiled in Fig 7), there’s an interesting spatial pattern whereby the Novaya Sibir Island site also has highly depleted IW isotope composition during MIS 3. What are the paleogeographic implications of Late Pleistocene sea level change, with respect to continentality? What are current and modelled MIS 3 moisture sources for that site and the Batagay site? Is there paleoceanographic proxy evidence (e.g. from planktic forams) for changes in surface water isotopic composition at likely moisture sources? All of these points would likely provide useful context for evaluating the data presented in the manuscript.

During MIS 3 the sea level was lower by 60 to 80 m, the wide Arctic shelves were exposed, leading to an increased continentality of entire Northeast Siberia. However, Novaya Sibir Island would still have the lowest continentality of all considered sites. To analyze current and modelled MIS3 moisture sources for Batagay and Novaya Sibir is beyond the scope of the manuscript which is not an MIS 3 stable isotope review but focusing on the cryostratigraphy and new ground ice isotope data from Batagay.

The issue of a changed surface water isotope composition at the moisture sources was also raised by referee #1. We added some thoughts on this to the discussion.

Other points: This manuscript, which includes many co-authors on earlier papers that document the chronostratigraphic framework for the site, introduces yet another unit-stratigraphic nomenclature for the Batagay megaslump headwall exposure. For example, at least by my interpretation, “upper Ice Complex” (this ms) = Unit III (Ashastina et al. 2017) = Unit 4 (Murton et al. 2017). Given the potential importance of this site, and since all the key players are co-authors on this manuscript, it would be very useful to the community if the authors could reconcile these different frameworks here in this manuscript.

You are right, the different stratigraphies which originate from different studied sections of the outcrop (see Figure 2) can be confusing. But observations of main units are more or less similar.

To relate the stratigraphies used in Ashastina et al. (2017) and Murton et al. (2017) and to establish a reconciled stratigraphy for future studies of the Batagay megaslump we added a new table (Table 1) containing this information.

This group is highly experienced in stable isotope studies of ground ice. Nevertheless, it would be useful to provide some additional methods data. Is the quoted lab precision for dD and d18O 1sigma or 2sigma? What are the summary statistics for the internal quality control secondary standard?

The lab precision at AWI Potsdam isotope lab is given as better than  $\pm 0.1\text{‰}$  for d18O and  $\pm 0.8\text{‰}$  for dD, respectively. For this purpose we use a three-point calibration for each measurement sequence and one standard for internal quality control. When one of the three standards is outside the ranges given above, the measurement is repeated.

All single measurements have a 1 sigma error, which is usually is  $<0.05\text{‰}$  for d18O and  $<0.5\text{‰}$  for dD. When the single measurement 1 sigma is larger than  $\pm 0.1\text{‰}$  for d18O and  $\pm 0.8\text{‰}$  for dD, the measurement is repeated.

When testing for internal quality control using an independent standard, these tests usually yield a statistical error of  $<0.05\text{‰}$  for d18O and  $<0.5\text{‰}$  for dD for long-term measurements ( $N > 20$ ). This is, however, not done for each individual sample series, but tested on a regular base (every few months).

And most importantly (p4/line24), how exactly did the authors decide which samples to exclude from further analyses? The description in the manuscript is very vague (please clarify, with a citation or two, what exchange processes are being invoked between IW and pore ice), and I would strongly prefer that the authors present ALL the ice-wedge stable isotope data first and then justify to readers why some data should be excluded from further consideration.

We first plotted the stable isotope profiles and compared them with our observations of sediment content in the wedge-ice samples. In total, five samples out of the studied seven wedges had to be excluded due to high sediment content and/or distinctly changed isotope values (similar to those of intrasedimental ice of host sediments). For transparency, we decided to present all ice-wedge stable isotope data to the supplement (Table S2) and indicate the excluded samples.

As far as we know these processes haven't been studied in detail. We therefore added two references to the manuscript (Meyer et al. 2002a, 2010) that present similar cases of exchange processes between wedge ice and host sediments (detectable in stable isotopes and electrical conductivity).

Specific comments:

Referencing: There are points in the introduction and discussion where it would be useful and appropriate to include some citations to relevant work in North America, where there is a long tradition of stable isotope work on ice wedges (e.g. Fraser and Burn; Michel) and the stratigraphic complexities of Middle/Late Pleistocene permafrost exposures (e.g. Péwé, Westgate; Fraser & Burn; Froese, Reyes).

Thank you for this suggestion. We, added some references to the introduction and discussion of chronostratigraphy.

Title: Given the substantial interpretive and chronological uncertainty re: the lower sand and upper unit ice wedge data, I suggest removing "Middle and Late Pleistocene" from the title and replacing it with something more specific

We replaced "Middle and Late Pleistocene" by "Past" to take into account the chronological uncertainty regarding the lower sand unit and consider the Holocene wedge.

Section 1 in the slump floor: Why is the one sampled wedge from the lower sand collected away from the exposed headwall, as indicated in Fig 3?

Due to the dangerous working conditions at the foot of a 55 m high and partly inclined headwall with thawed material falling down constantly, we decided to sample this wedge in another position.

Can authors reject the possibility that the sampled section is actually younger material displaced into an apparently lower stratigraphic position by slumping?

Yes, we can do this. Several ice wedges were found in the lower part of the lower sand unit in the badlands-like not degraded remains of the slump floor. The material sampled fits well with observations made at the headwall. Also, there was no evidence of slip surfaces observed in or near section 1. The ice-wedge itself was an intact, freshly exposed ice-wedge.

And I'm troubled by the rejection of the 14C age on hare droppings from the ice-wedge. If this was a pristine, freshly exposed ice-wedge, how would younger material be incorporated into the wedge itself? Surely the outermost surface of the wedge ice is removed prior to sampling? And if material "entered into or later froze onto the surface" (p8/line24), doesn't this also imply possible reliability issues with the isotope data from that wedge?

Given the IRSL age reported in Ashastina et al. (2017) we can exclude a younger age than MIS 6 for this sample. Therefore, the young age has to be caused by contamination. We see only one possible way: contamination of a non-finite age of the hare dropping by modern carbon during the handling of the ice-wedge sample (i.e. modern tiny and/or dissolved carbon from e.g. mud attached to the hare dropping in the sample bag).

As the ice wedge itself is melting constantly it is somehow "cleaning itself" and the only possible contamination possible would be with own meltwater.

p8/line18: Do you mean "...different stratigraphic contexts"? This would make more sense. Also, the next few sentences of this paragraph are pretty vague and not particularly useful. I think it's pretty obvious now that adequate dating of these sediments is going to be a major challenge. There's some mention of alternative approaches in the conclusion section, which really should be moved into the discussion and properly addressed.

We added some discussion on dating old permafrost and ice wedges to section 5.1.

wood layer and the thaw unconformity (p. 8/9 transition): I assume you mean "...situated above the lower sand unit and BELOW the upper Ice Complex. ..." on p8/line29, since you reasonably attribute the wood layer to the last interglacial?

You are right, changed accordingly.

14C dating (Table 2 and p5): I appreciate the details on pre-treatment and analysis. Please clarify if smaller blanks were measured for background correction of the many samples with low mass of organic C (Table 2).

Size-matched standards and blanks were analysed along with the samples and were used for normalization and blank correction. We added this information to the text.

Fig. 5: The changing vertical scale is confusing. Since the ice-wedge morphology is important in this context, I recommend a stratigraphic diagram to scale, with additional panels showing the photographs that are currently relegated to the Supplemental file.

We considered this suggestion. As a stratigraphic diagram to scale would look a bit spartan. Hence, we decided to keep the original diagram but to add indications for the broken vertical scale. We feel, that the ice-wedge photographs are well placed in the supplement.

Fig 6. The blue inverted triangles for upper sand ice wedges are very hard to distinguish.

We changed the colors to improve visible distinguishability.

References: Ashastina et al. 2017 *Climate of the Past* 13: 795-818. Murton et al. 2017 *Quat Res* 87: 314-330. Opel et al. 2017 *Climate of the Past* 13: 587-611.
